# Supplementary material
Source: PubMed Central journal article supplement (PMC6476458)
Supplement: CONC-26-e155-s001.pdf [file CONC-26-e155-s001.pdf]

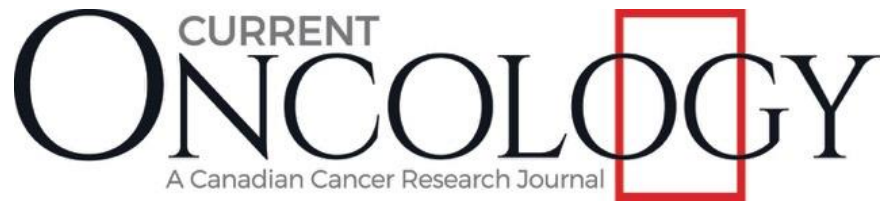

## **Supplemental Materials for**

Impact of a novel prioritization framework on clinician-led oncology drug submissions.

J. Keech, J. Beca MSc, A. Eisen MD, E. Kennedy MD PhD, J. Kim MD, C. T. Kouroukis MSc MD, G. Darling MD, S. E. Ferguson MD, A. Finelli MSc MD, T. M. Petrella Msc MD, J. R. Perry MD, K. Chan MD MSc PhD, S. Gavura BSc(Pharm) MBA.

### **Listing of Supplemental Material(s):**

Supplemental Appendix 1: <<Public Reimbursement of Cancer Drugs in Ontario>>

Supplemental Table 1: <<Mechanisms for the Public Reimbursement of Cancer Drugs in Ontario>>

## Supplemental Appendix 1: Public Reimbursement of Cancer Drugs in Ontario

Drugs that are administered in an outpatient systemic treatment clinic are commonly eligible for funding through the New Drug Funding Program (NDFP) or Evidence Building Program (EBP), and drugs dispensed at community pharmacies are commonly eligible for funding through Ontario Drug Benefit (ODB) programs, including the Exceptional Access Program (EAP). Drugs eligible for funding through these programs require submission of a formal funding request and thus can be brought forward to the cross-site prioritization. Other gaps can occasionally be addressed via alternative funding mechanisms including the Case-by-Case Review Program (CBCRP) or Systemic Treatment Quality Based Program (STQBP).

### Supplemental Table 1: Mechanisms for the Public Reimbursement of Cancer Drugs in Ontario

| Funding Mechanism            | Purpose                                                                                                                                                                                                                                                                                                                                                                                                                                                                | Eligible for cross cancer-site prioritization? |
|------------------------------|------------------------------------------------------------------------------------------------------------------------------------------------------------------------------------------------------------------------------------------------------------------------------------------------------------------------------------------------------------------------------------------------------------------------------------------------------------------------|------------------------------------------------|
| New Drug Funding Program     | Covers funding for approved injectable cancer drugs administered in hospitals and cancer centres. <sup>1</sup><br><a href="https://www.cancercareontario.ca/en/Funding/New_Drug_Funding_Program">https://www.cancercareontario.ca/en/Funding/New_Drug_Funding_Program</a>                                                                                                                                                                                              | Yes                                            |
| Ontario Drug Benefit Program | Covers funding for patients older than 65 or who are enrolled in home care, Ontario works, Disability support, Trillium or OHIP plus. <sup>2</sup><br><a href="https://www.ontario.ca/page/get-coverage-prescription-drugs">https://www.ontario.ca/page/get-coverage-prescription-drugs</a>                                                                                                                                                                            | Yes                                            |
| Exceptional Access Program   | Facilitates patient access to drugs not funded on the Ontario Drug Benefit (ODB) Formulary, or where no listed alternative is available. Patients must be eligible to receive benefits under the Ontario Drug Benefit (ODB) program to receive coverage. <sup>2</sup><br><a href="http://www.health.gov.on.ca/en/pro/programs/drugs/eap_mn.aspx">http://www.health.gov.on.ca/en/pro/programs/drugs/eap_mn.aspx</a>                                                     | Yes                                            |
| Evidence Building Program    | Resolves uncertainty around clinical and cost-effectiveness data related to the expansion of cancer drug coverage within Ontario. <sup>1</sup><br><a href="https://www.cancercareontario.ca/en/Funding/Evidence_Building_Program">https://www.cancercareontario.ca/en/Funding/Evidence_Building_Program</a>                                                                                                                                                            | Yes                                            |
| Case by Case Review Program  | Considers funding requests for oral and injectable cancer drugs for cancer patients who have rare clinical circumstances that are immediately life threatening, and who require treatment with an unfunded drug because there is no other satisfactory and funded treatment. <sup>1</sup><br><a href="https://archive.cancercare.on.ca/cms/One.aspx?portalId=1377&amp;pageId=118915">https://archive.cancercare.on.ca/cms/One.aspx?portalId=1377&amp;pageId=118915</a> | No                                             |

|                                            |                                                                                                                                                                                                                                                                                                                                                                                                                                                                                   |    |
|--------------------------------------------|-----------------------------------------------------------------------------------------------------------------------------------------------------------------------------------------------------------------------------------------------------------------------------------------------------------------------------------------------------------------------------------------------------------------------------------------------------------------------------------|----|
| Systemic Treatment – Quality Based Program | Manages funding for the delivery of outpatient systemic treatment services based on evidence-informed practice as well as regimen delivery and supportive care funding. <sup>1</sup><br><br><a href="https://www.cancercareontario.ca/en/cancer-treatments/chemotherapy/funding-reimbursement/systemic-treatment-quality-based-procedure">https://www.cancercareontario.ca/en/cancer-treatments/chemotherapy/funding-reimbursement/systemic-treatment-quality-based-procedure</a> | No |
|--------------------------------------------|-----------------------------------------------------------------------------------------------------------------------------------------------------------------------------------------------------------------------------------------------------------------------------------------------------------------------------------------------------------------------------------------------------------------------------------------------------------------------------------|----|

**Supplemental References:**

1. Drug Formulary - Funding & Reimbursement. *Cancer Care Ontario* Available at: <https://www.cancercareontario.ca/en/cancer-treatments/chemotherapy/funding-reimbursement>. (Accessed: 16th May 2018)
2. Get coverage for prescription drugs. *Ontario* (2018). Available at: <https://www.ontario.ca/page/get-coverage-prescription-drugs>. (Accessed: 16th May 2018)
